# Supplementary material
Source: PubMed Central journal article supplement (PMC3339117)
Supplement: 580202.f1.pdf [file 580202.f1.pdf]

**ANNEXURE – I**

**PATIENT'S RECORD FORM**

No: \_\_\_\_\_

1. Name: \_\_\_\_\_

2. Address: \_\_\_\_\_

\_\_\_\_\_

\_\_\_\_\_

3. Tele No: (R) \_\_\_\_\_ (M) \_\_\_\_\_ Email ID: \_\_\_\_\_

4. Age: \_\_\_\_\_ Gender: (M) \_\_\_\_\_ (F) \_\_\_\_\_ Height (Cm): \_\_\_\_\_

5. Weight (Kg): \_\_\_\_\_ B.M.I. \_\_\_\_\_ Ideal Wt \_\_\_\_\_ Fat % \_\_\_\_\_

6. Waist (Cm): \_\_\_\_\_ Hip (Cm) \_\_\_\_\_ W. H .Ratio \_\_\_\_\_

7. Duration of Diabetes: Years \_\_\_\_\_

**II Type of DM**

Type I \_\_\_\_\_

**8. FAMILY HISTORY:**

Type II \_\_\_\_\_

Mother \_\_\_\_\_ Father \_\_\_\_\_ Brother \_\_\_\_\_ Sister \_\_\_\_\_

LADA \_\_\_\_\_

**9. MEDICAL HISTORY:**

MODY \_\_\_\_\_

Ht \_\_\_\_\_ Dyslipidemia \_\_\_\_\_ Neuropathy \_\_\_\_\_

DOY \_\_\_\_\_

Nephropathy \_\_\_\_\_ Retinopathy \_\_\_\_\_ CHD \_\_\_\_\_

GDM \_\_\_\_\_

10. Present Treatment OHA \_\_\_\_\_ Insulin \_\_\_\_\_

11. **TREATMENT ADVISED** \_\_\_\_\_

\_\_\_\_\_

\_\_\_\_\_

12. Present Diet Veg: \_\_\_\_\_ Non Veg: \_\_\_\_\_

**13. PERSONAL HISTORY:**

Life style: Sedentary \_\_\_\_\_ Active \_\_\_\_\_ Moderate \_\_\_\_\_

Exercise: Yes \_\_\_\_\_ No \_\_\_\_\_ Tobacco \_\_\_\_\_

Type of Exercise: \_\_\_\_\_ Smoking \_\_\_\_\_

Alcohol \_\_\_\_\_

Sleep \_\_\_\_\_

| <b>Date</b> | <b>F.B.S</b> | <b>P.P.Bs</b> | <b>Weight</b> | <b>CHO</b> | <b>Hb A/c</b> |
|-------------|--------------|---------------|---------------|------------|---------------|
|             |              |               |               |            |               |
|             |              |               |               |            |               |
|             |              |               |               |            |               |
|             |              |               |               |            |               |
|             |              |               |               |            |               |
|             |              |               |               |            |               |
|             |              |               |               |            |               |

## **ANNEXURE - II**

### **PATIENT INFORMATION SHEET**

The present study is aimed at identifying and establishing the characteristics of a new type of Diabetes mellitus known as Latent Autoimmune Diabetes in Adults (LADA).

Although diabetes is mainly classified into two main types, Type 1 and Type 2, a new type of diabetes, LADA, has been identified which shows the characteristics of both Type 1 and Type 2. Often people with LADA are mistakenly diagnosed as Type 2 diabetics.

Since this type of diabetes is recently discovered, adequate work is to be done pertaining to its prevalence, prevalence, characteristics, pathophysiology, complications, diagnostic markers and the genes involved. This study would thus help in designing an efficient therapeutic regimen for LADA patients.

In this study, 10 ml blood would be taken, only once; from which mainly 2 tests would be performed-GAD Antibodies Test and C-Peptide Test, which would help in confirmation of LADA. These tests would be performed free of cost and the results would be used to decide whether you are a Type 1, Type 2 or LADA patient. This information obtained would help your physician to decide the treatment strategies most suitable for you, to maintain adequate blood sugar levels and to delay diabetic complications. Thus without any side effects, you can get total benefit from it.

As this is a simple observational study, which does not involve any harmful procedures, there is no risk involved for participation in the study.

Your participation in the study would be totally voluntary. The results of the study would be restricted to you, the investigator and the doctor only.

**ANNEXURE – III**  
**PATIENT INFORMED CONSENT FORM**

I, \_\_\_\_\_, Age: \_\_\_\_\_ years,  
Gender \_\_\_\_\_, undersigned, give my free voluntary informed consent to participate in the research project entitled “Characterization and prevalence of LADA patients in diabetic population”.

I, hereby ascertain that my participation in the study is absolutely voluntary. I have been given a patient information sheet, fully explaining the purpose and matter pertaining to the study, to my satisfaction. In this study, my blood will be withdrawn in the amount of 10 ml only, a single time. This collected blood will be assessed for study purpose only.

I understand that there are no benefits monetary or otherwise from my participation and a satisfactory report of the study will be provided to me.

I am aware of my rights as well as the fact that the aims of this study are totally scientific in nature and I have been informed that the data of this study in the future may be published without revealing my identity.

I am made aware that there are no risks involved in any of the protocol related procedures except those pertaining to withdrawal of blood which are relatively very small and are independent of the study.

\_\_\_\_\_  
Signature of Patient

\_\_\_\_\_  
Signature of Investigator

Patient’s Name: \_\_\_\_\_

Date : \_\_\_\_\_

Patient No. : \_\_\_\_\_

## ANNEXURE – IV

### Statement of Approval of Ethical Committee

#### **MEDILINK INDEPENDENT ETHICS COMMITTEE**

**Symmers Pathcare Basement Medilink Hospital**

Opp. Someshwara Jain Temple, 132 ft Ring Road, Satellite, Ahmedabad-380015

Phone. : (M) 9824267669 (O) 079-65215936, 26730644

#### APPROVAL / REJECTION / CONDITIONAL APPROVAL LETTER

Date: 29<sup>th</sup> Dec 2007

To,  
**Dr. Anoop Misra**  
**Dr. G.S. Khatri**  
**Dr. Ramesh Goyal**  
**Dr. Banshi Saboo**  
Medilink Reserach Centre  
Opposite Someshwara Jain Temple  
132 Feet Ring Road  
Satellite, Ahmedabad  
India

**Ref : Phenotypic and Genetic Correlates in Young Patients with Diabetes (Non-Type 1) in the State of Gujarat**

**Sub: Ethics Committee Approval for conduct of the referenced study at Medilink Research Centre, Basement , Medilink Hospital, Opp. Jain Someshwara Temple, 132 feet Ring Road, Satellite, Ahmedabad-380015.**

**Respectd Sir,**

With reference to the above subject we write to inform you that the **Medilink Independent Ethics Committee** in its meeting of 29<sup>th</sup> Dec 2007, reviewed the documents mentioned in your submission letter dated 24<sup>th</sup> Dec 2007.

The **Medilink Independent Ethics Committee** has conducted an ethical review of the documents for the above referenced clinical study. The IEC reviewed the following documents & grants its approval:

1. The project protocol.
2. Informed consent form, English version dated 21 December 2007.
3. Informed consent form Gujarati Version dated 21 December 2007.

## MEDILINK INDEPENDENT ETHICS COMMITTEE

Symmers Pathcare Basement Medilink Hospital

Opp. Someshwara Jain Temple, 132 ft Ring Road, Satellite, Ahmedabad-380015

Phone. : (M) 9824267669 (O) 079-65215936, 26730644

The following members attended the IEC meeting for the review of this clinical <sup>study</sup> trial:

| S. No. | Name of member       | Role in IEC            | Signature                                                                           |
|--------|----------------------|------------------------|-------------------------------------------------------------------------------------|
| 1      | Dr. J. Mang Ganhi    | Chairperson            |    |
| 2      | Dr. Gajanan Mohata   | Clinicians Chairperson |    |
| 3      | Dr. Bhavesh M. Vyas  | Member Secretary       |    |
| 4      | Dr. A. H. Sumra      | member                 |   |
| 5      | Samir J. Dane        | Member                 |  |
| 6      | Ms. A. J. Manbaj     | Member                 |  |
| 7      | Mrs. I. R. Muthwarde | Legal person           |  |
| 8      |                      |                        |                                                                                     |

  
29/12/07

We confirm that neither you nor your study team members participated in the deliberations of the Ethics Committee & did not vote on the proposal for this study.

Promptly report to the IEC:

- Any changes to or deviations to the protocol approved by the IEC that you may implement to eliminate hazards to the trial subjects
- All serious adverse events
- New information that may affect adversely the safety of the subjects or the conduct of the trial

Please submit to the IEC the status report of the study after every 1 months interval.

The IEC is organized & operates according to the requirements of ICH-GCP & Indian Council of Medical Research & Schedule Y.

Yours sincerely,

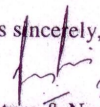  
29/12/07  
Signature & Name of Chairperson, Ethics committee with Date



**ANNEXURE – V**  
**Patient Information Sheet**

દર્દી માટે માહિતી પત્રક

આ અભ્યાસ ડાયાબિટીસ (મધુ પ્રમેહ) ના એક નવા પ્રકાર, લેટેન્ટ ઓટોઇમ્યુન ડાયાબિટીસ ઈન એડલ્ટ્સ (લાડા), ના લક્ષણો ઓળખવા અને સ્થાપિત કરવા માટેનો એક પ્રયત્ન છે.

ડાયાબિટીસના મુખ્ય બે પ્રકાર છે, ટાઇપ ૧ અને ટાઇપ ૨. લાડાના દર્દીઓ બંને ટાઇપ ૧ અને ટાઇપ ૨ નાં લક્ષણો ધરાવતા હોય છે. આથી, લાડાના દર્દીઓનું પરીક્ષણ અયોગ્યપણે, ઘણીવાર ટાઇપ ૨ તરીકે થાય છે.

લાડાનું સંશોધન હમણા જ થયેલું હોવાથી, તેનું દર્દીઓમાં પ્રમાણ, લક્ષણો, કારણો, તેથી થતી બીજી તકલીફો, પરિક્ષણના સાધનો અને ભાગ લેતા જનીન (Genes) વિશેની પૂરતી માહિતી પ્રાપ્ય નથી. આ અભ્યાસથી લાડાની સારવાર અંગે યોગ્ય માહિતી પ્રાપ્ત થશે.

આ અભ્યાસમાં તમારુ લોહી પરીક્ષણ દરમિયાન ફક્ત એક જ વાર ૧૦ મી.લી. (10ml) લેવામાં આવશે. જેમાથી મુખ્યત્વે ૨ પરીક્ષણો કરવામાં આવશે. – ગેડ એન્ટીબોડી ટેસ્ટ (GAD Antibodies Test) અને સી-પેપ્ટાઇડ ટેસ્ટ (C-Peptide Test), જે લાડાને સ્થાપિત કરવા માટે મદદ કરશે. આ પરીક્ષણો વિના મૂલ્યે કરવામાં આવશે અને પરિણામો પરથી તમે ટાઇપ ૧, ટાઇપ ૨ અથવા લાડા ના દર્દી છો તે નક્કી કરવામાં આવશે. આ માહિતી તમારા ડોક્ટરને તમારા માટે યોગ્ય ચિકિત્સા નક્કી કરવામાં મદદરૂપ થશે જેથી તમારા લોહીમાં સાકરનું પ્રમાણ (Blood Sugar Level) પ્રમાણસર રહી શકે અને ડાયાબિટીસને લગતી બીજી તકલીફોનો ઘટાડો થઈ શકે.

આ એક સરળ અવલોકન અભ્યાસ છે, જેમાં કોઈ હાનિકારક પ્રયોગ નથી. આથી આ અભ્યાસમાં ભાગ લેવાથી તમને કોઈપણ જાતનું નુકશાન નથી.

આ અભ્યાસમાં ભાગ લેવો સંપૂર્ણપણે સ્વૈચ્છિક છે. આ અભ્યાસના તારણો સંપૂર્ણપણે તમારા, અન્વેષક અને ડોક્ટર સુધી જ સીમિત રહેશે.

## ANNEXURE – VI

### Patient Informed Consent Form

#### દર્દી સૂચિત સંમતિ પત્રક

હું, શ્રી/શ્રીમતી..... ઉંમર ..... વર્ષ, નીચે સહી કરનાર અહીં રાજીખુશીથી “ Characterization and Prevalence of LADA Patients in Diabetic Population” નામના સંશોધન પ્રોજેક્ટમાં ભાગ લેવા સંમતિ આપુ છું.

હું એ પણ જાણું છું કે આ અભ્યાસમાં મારી ભાગીદારી સંપૂર્ણપણે સ્વૈચ્છિક છે. આ અભ્યાસને લગતી વિગતો અને હેતુઓ વિશે સંપૂર્ણ સંતોષકારક માહિતી આપનાર દર્દી માહિતી પત્રક મને આપવામાં આવ્યું છે. આ અભ્યાસમાં મારું ૧૦ મી.લી. (10ml) લોહી લેવામાં આવશે, જે સંપૂર્ણપણે અભ્યાસ માટે જ વાપરવામાં આવશે.

હું સમજુ છું કે આ અભ્યાસમાં મારી ભાગીદારી થી આર્થિક કે બીજા કોઈપણ પ્રકારનો ફાયદો નથી અને મને આ અભ્યાસનો સંતોષકારક રીપોર્ટ આપવામાં આવશે. હું આ અભ્યાસના પરિણામો મારી ઓળખ વગર પ્રકાશિત કરવાની સંમતિ આપું છું.

મને જણાવવામાં આવ્યું છે કે અભ્યાસને લગતી કાર્યવિધિના પરિણામે કોઈપણ ખતનું જોખમ નથી સિવાય કે – લોહી લેતી વખતે થનારા જોખમો, કે જે પ્રમાણમાં ખુબ જ નાના છે અને જેને અભ્યાસ સાથે કોઈ સંબંધ નથી.

\_\_\_\_\_  
(દર્દી ની સહી)

\_\_\_\_\_  
(અન્વેક્ષકની સહી)

નામ :

તારીખ :

દર્દીનો નંબર:



**Note:**

The last two documents are in the local language (Gujarati) of the state of India, where the study was carried out, translated from their respective English documents in order to facilitate patient compliance.

These documents were approved by the Ethics Committee and given to each patient enrolled in the study and the study was carried out only after receiving back the signed consent forms from the patients.

Since the study involved a large population it is not possible to incorporate all the forms for submission to your journal. Hence we have attached a sample copy of each document for your kind consideration.
